# Supplementary material
Source: PubMed Central journal article supplement (PMC3799832)
Supplement: NIHMS487271-supplement-1.pdf [file NIHMS487271-supplement-1.pdf]

# Structural studies on Full-length Talin1 reveal a compact auto-inhibited dimer: Implications for talin activation

Benjamin T Goult<sup>1</sup>, Xiao-Ping Xu<sup>2</sup>, Alexandre R Gingras<sup>1\*</sup>, Mark Swift<sup>2</sup>, Bipin Patel<sup>1</sup>, Neil Bate<sup>1</sup>, Petra M Kopp<sup>1</sup>, Igor L Barsukov, David R Critchley<sup>1</sup>, Niels Volkmann<sup>2</sup>, Dorit Hanein<sup>2</sup>

## SUPPLEMENTARY FIGURES

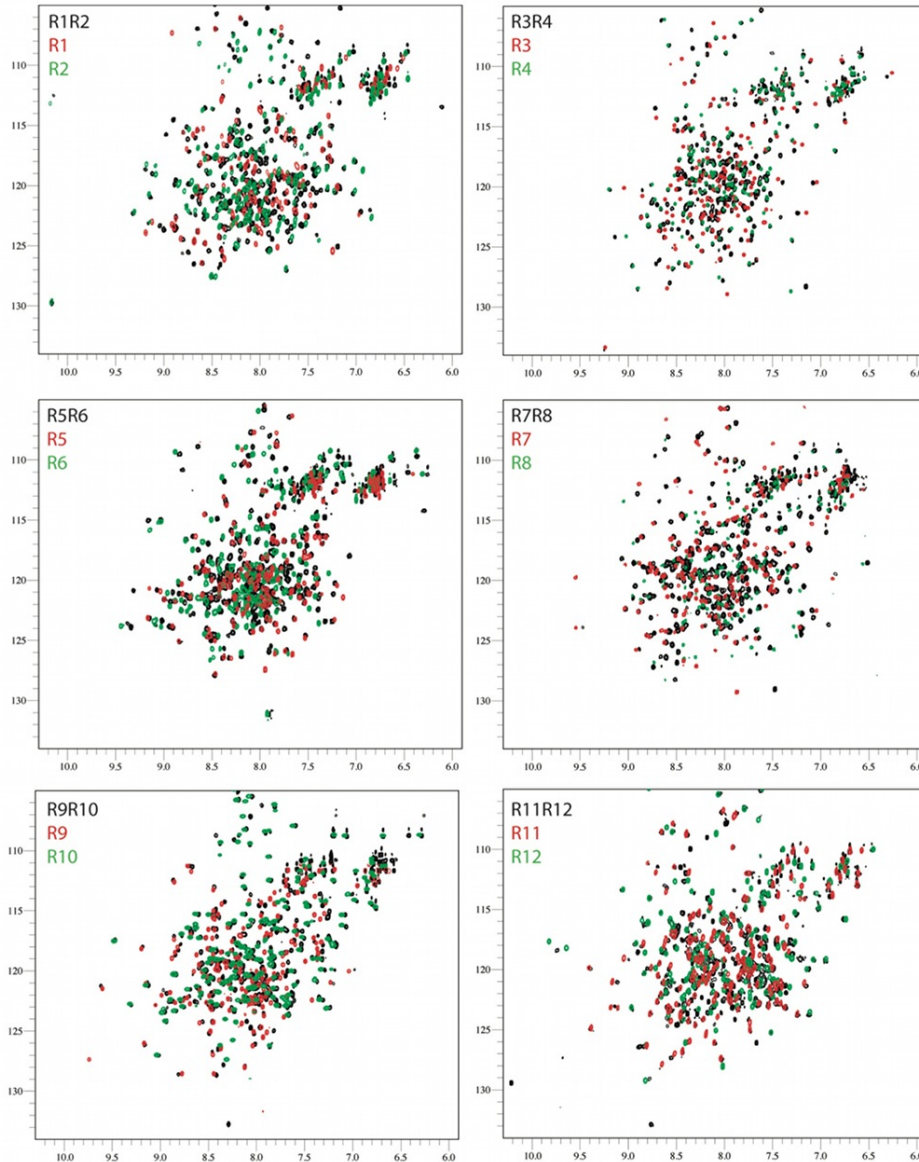

**Figure S1.**  $^1\text{H}, ^{15}\text{N}$ -HSQC spectra of  $^{15}\text{N}$ -labeled talin1 double domains. NMR spectra of R1-R2 (482-911), R3-R4 (913-1206), R5-R6 (1046-1357), R7-R8 (1357-1653), R9-R10 (1655-1973), R11-R12 (1974-2294) (100  $\mu\text{M}$ ). The relevant individual domain spectra are overlaid (red and green) on the double domain spectra (black), in general, the spectra of the individual domains overlap well with those of the corresponding double domains, supporting the idea that domains are joined by short flexible linkers. However, large differences are observed in the spectra of R1 and R2 compared with the R1R2 double domain. This is due to the extensive interface between the two domains (Papagrigoriou et al., 2004). The spectrum of R11R12 is markedly broader than those of the other double domains since the two domains are linked by an almost continuous helix (Gingras et al., 2009).

CLUSTAL W (1.83) multiple sequence alignment

```

sp|P26039|TLN1_MOUSE|MVALSLKISIGNVVKTMQFEPSTMVYDACRMIRERIPREALAGPPNDFGLFSLSDDDPKKGIWLEAGKALDYMLRNGDTME 80
sp|P54939|TLN1_CHICK|MVALSLKISIGNVVKTMQFEPSTMVYDACRMIRERVPEAQMGQPNDFGLFSLSDDDPKKGIWLEAGKALDYMLRNGDTME 80
*****;*** * *****;*****

sp|P26039|TLN1_MOUSE|YRKKQRPLKIRMLDGTVKTIMVDDSKTVTDMGMTICARIGITNHDEYSLVRELMEEKDEGTGTLRKDKTLLRDEKKMEK 160
sp|P54939|TLN1_CHICK|YRKKQRPLKIRMLDGTVKTIMVDDSKTVTDMGMTICARIGITNYDEYSLVREIMEEKKEVGTGLKKDKTLLRDEKKMEK 160
*;*****;***** *****;*****;*****; * ***;*****

sp|P26039|TLN1_MOUSE|LKQKLHTDDELNWLHDHGRITLREQGVEEHETLLLRKFFYSQNVDSRDPVQLNLLYVQARDDILNGSHPVSPDKACEFAG 240
sp|P54939|TLN1_CHICK|LKQKLHTDDELNWLHDHGRITLREQGIDNETLLLRKFFYSQNVDSRDPVQLNLLYVQARDDILNGSHPVSPDKACEFAG 240
*****;::;*****

sp|P26039|TLN1_MOUSE|FQCQIQFPGPHNEQKHKAGFLDLKDFLKEYVKQKGERKIFQAHKNCQGMSEIEAKVRYVKLARSLKTYGVSPFLVKEKMK 320
sp|P54939|TLN1_CHICK|YQCQIQFPGPHNEQKHKPGFLELDFLKEYIKQKGERKIFMAHKNCGNMSEIEAKVRYVKLARSLKTYGVSPFLVKEKMK 320
:*****;_*;*****;***** *****;*****

sp|P26039|TLN1_MOUSE|GKNKLVPRLLGITKECVMRVEDEKTKVEIQEWSLTIKRWAAAPKSFITLDFGDYQDGYYSVQTTEGEQIAQLIAGYIDIIIL 400
sp|P54939|TLN1_CHICK|GKNKLVPRLLGITKECVMRVEDEKTKVEIQEWSLTIKRWAAAPKSFITLDFGDYQDGYYSVQTTEGEQIAQLIAGYIDIIIL 400
*****

sp|P26039|TLN1_MOUSE|KKKSKDHFGLGDEESTMLEDSVSPKKSTVLQQQQYRNVGKVEHGSVALPAIMRSGASGPENFQVGSMPPAQQOITSGQM 480
sp|P54939|TLN1_CHICK|KKKSKDHFGLGDEESTMLEDSVSPKKSTVLQQQQYRNVGKAEELGVALPAIMRTGAGGPENFQVGTMPQAQMQITSGQM 480
*****;*****_* *****;*.*****;** * *****

sp|P26039|TLN1_MOUSE|HRGHMPPLTSAQQALTGTINSSMQAVQAAQATLDDFETLPLPGLQDAASKAWRKNKMDKESKHEIHSQVDAITAGTASVVNL 560
sp|P54939|TLN1_CHICK|HRGHMPPLTSAQQALTGTINSSMQAVNAQAATLDDFETLPLPGLQDAASKAWRKNKMDKESKHEIHSQVDAITAGTASVVNL 560
*****;*****;*****

sp|P26039|TLN1_MOUSE|TAGDPAETDVTAVGCAVTTISSNLTEMSRGVKKLLAALLEDEGGNGRPLLQAAGLAGAVSELLRQAQASAEPRQNLLQA 640
sp|P54939|TLN1_CHICK|TAGDPADTDTAVGCAVTTISSNLTEMSKGVKKLLAALMEDEGGNGRQLLQAANKLASAVSDLLKTAQASAEPRQNLLQA 640
*****;*****;***** *****_*_*;*:;*****

R1-R2
sp|P26039|TLN1_MOUSE|AGNVGQASGELLQQIGESDTPHFQDVLMLQAKAVASAAAALVLKAKSVAQRTEDSGLQTQVIAAATQCALSTSQLVACT 720
sp|P54939|TLN1_CHICK|AGLVGQTSGELLQQIGESDTPHFQDMLMLQAKAVASAAAALVLKAKNVAQKTESALQTQVIAAATQCALSTSQLVACT 720
**_*;*****;*****_*;*****_*;*****_* *****

R2-R3
sp|P26039|TLN1_MOUSE|KVVAPTISPPVCQEQLVEAGRLVAKAVEGCVSASQAATEDGQLLRGVGAAATAVTQALNELLQHVKAHATGAGPGRYDQ 800
sp|P54939|TLN1_CHICK|KVVAPTISPPVCQEQLIEAGLVAKSAEGCVEASKAATNDDQLLKQVGAATAVTQALNDLLQHIKQHATGGQPIGRYDQ 800
*****;*****;*.*****_*;*:;*:;*:;*:;*:;*.*****;*****;* *****_* *****

sp|P26039|TLN1_MOUSE|ATDTILTVTENIFSSMGDAGEMVRQARILAQATSDLVNAIKADAEGESDLENSRKLSSAAKILADATAKMVEAAKGAAAH 880
sp|P54939|TLN1_CHICK|ATDTILNVTENIFSSMGDAGEMVRQARILAQATSDLVNAIKADAEGETDLENSRKLSSAAKILADATAKMVEAAKGAAAH 880
*****;*****;*****

R3-R4
sp|P26039|TLN1_MOUSE|PDSEEQQRLREAAEGLRMTNAAQNAIKKKLVQRLEHAQAQAASATQTIAAAQHAASAPKASAGPQLLVQSCKAVA 960
sp|P54939|TLN1_CHICK|PDSEEQQRLREAAEGLRMTNAAQNAIKKKLVHKLHAQAQAASATQTIAAAQHAASAKNPNAAQ-QLVQSCKVVA 959
*****;*****;*****;*.*****_* *****_*

sp|P26039|TLN1_MOUSE|EQIPLLVQGVRSQAQPDSPSAQLALIAASQSFQPGGKMVAAKASVPTIQDQASAMQLSQCAKNLGTALAEELRTAAQK 1040
sp|P54939|TLN1_CHICK|DQIPMLVQGVRSQSQPDSPSAQLALIAASQNFQPGGKMVAAKATVPTITDQASAMQLSQCAKNLAAALAEELRTAAQK 1039
;*:;*****;*****_*;*****;*****;*****;*****_*;*****

R4-R5
sp|P26039|TLN1_MOUSE|AQEACGPLEMDSALSVVQNEKDLQEIKAARDGKLPPLGETMEKCTQDLGNSTKAVSSAIAKLLGEIAQGNENYAGIA 1120
sp|P54939|TLN1_CHICK|AQEACGPLEIDSALGLVQSLERDLKEAKAAARDGKLPPLGETMEKCAQDLGNSTKAVTSAIAHLLGEVAQGNENYTGIA 1119
*****;*****_*;*.*****_*;*:;*:;* *****;*****;*****;*****;*****_*

sp|P26039|TLN1_MOUSE|ARDVAGGLRSLAQAAARGVAALTSQPAVQAVLDTASDVLKASSLIEEAKKASGHPGDPESQQRQAQVAVKAVTQALNRCV 1200
sp|P54939|TLN1_CHICK|AREVAQALRSLAQAAARGVAANSSDPAQNALECASDVMKANNLIEEARKAVAKPDPDPSQQRQLVQVAVKAVSQUALNRCV 1199
**_*_*;*****_*;***_*_*;*:;*****;*****_*;*****_*_*;*****;*****;*****

R5-R6
sp|P26039|TLN1_MOUSE|SCLPGQRDVDNALRAVGDASKRLLSDSLPSTGTGFQEAQSRLEAAAGLNQAATELVQASRGTPQDLARASGRFGQDFST 1280
sp|P54939|TLN1_CHICK|NCLPGQRDVDAAIRMVGEASKRLLSDSFPNKNKTFQEAQSQLNRAAGLNQSANELVQASRGTPQDLAKSNGKFGQDFNE 1279
.*****_*_*_*;*****;*****_* *****;*.*****;*.*****;*.*****;*.*****;*.*****

R6-R7
sp|P26039|TLN1_MOUSE|FLEAGVEMAGQAPSQEDRAQVVSNLKGISMSSSKLLLAALKALSTDPASPNLKSQLAARAVTDSINQLITMCQQAPGQ 1360
sp|P54939|TLN1_CHICK|FLQAGVEMASLPTKEDQAQVVSNLKGISMSSSKLLLAALKALSADPTSPNLKSQLAARAVTDSINQLITMCQQAPGQ 1359
**_*;*****_*;*:;*****;*****;*****;*****;*****;*****;*****;*****;*****;*****;*****;*****

```

|                |        |            |                                                                                                                                                                        |      |
|----------------|--------|------------|------------------------------------------------------------------------------------------------------------------------------------------------------------------------|------|
| sp             | P26039 | TLN1_MOUSE | KECDNALRQLETVRELLNPVQPIINDMSYFGCLDSVMENSKVLGEAMTGISQNAKNGNLPEFGDAIATASKALCGFTEAA                                                                                       | 1440 |
| sp             | P54939 | TLN1_CHICK | KECDNALRELETVKELLENPTQTVNDMSYFSCLDVSMENSKVLGESMAGISQNAKNSKLPEFGESISAASKALCGLTEAA<br>*****;****;*****.*;*****.*****;*****;*****;*****;*****;*****;*****                 | 1439 |
| sp             | P26039 | TLN1_MOUSE | AQAAYLVGVSDPNSQAGQQGLVEPTQFARANQAIQMACQSLGEPGCTQAQVLSAATIVAKHTSALCNSCLASARTANPT                                                                                        | 1520 |
| sp             | P54939 | TLN1_CHICK | AQAAYLVGVSDPNSQAGQQGLVDPTQFARANQAIQMACQNLVDPACTQSQVLSAATIVAKHTSALCNTCRLASRTANPV<br>*****;*****;*****.*;*.***;*****;*****;*****;*****;*****;*****                       | 1519 |
| sp             | P26039 | TLN1_MOUSE | AKRQFVQSAKEVANSTANLVKTIKALDGFPTENRAQCRAATAPLEAVDNLSAFASNPEFSSVPAQISPEGRAAMEPIV                                                                                         | 1600 |
| sp             | P54939 | TLN1_CHICK | AKRQFVQPAKEVANSTANLVKTIKALDGFANNEENRERCRATAPLEAVDNLTAFASNPEFATVPAQISPEGRAMEPIV<br>*****.*****;*****.*;****;*****;*****;*****;*****;*****;*****;*****                   | 1599 |
| <b>R7-R9</b>   |        |            |                                                                                                                                                                        |      |
| sp             | P26039 | TLN1_MOUSE | ISAKTMLESAGLIQTARALAVNPRDPFRVSVLAGHSRTVSDSIKKLITSMRDK <b>APGQ</b> LECEITAALNSCLRDLDQASL                                                                                | 1680 |
| sp             | P54939 | TLN1_CHICK | TSAKTMLESSAGLIQTARSLAVNPKDPFPQVSVLAGHSRTVSDSIKKLITNMRDK <b>APGQ</b> RECEIDAIDLNRCRMREVDAQSL<br>*****;.*****;*****;****;*****;*****;*****;*****;*****;*****;*****;***** | 1679 |
| sp             | P26039 | TLN1_MOUSE | AAVSQQLAPREGISQEAHTQMLTAVQEISHLIEPLASAAAEASQLGHKVSQMAQYFEPILTLAAVGAASKTSLHPQQMA                                                                                        | 1760 |
| sp             | P54939 | TLN1_CHICK | AAISQQLAPREGISQEAHLNQMIVTAVQEIINLIEPVASAAAEASQLGHKVSQMAQYFEPILILAAIGAASKTPNHQQQMN<br>**;*****;*****.*;*****;.****;*****;*****;*****;*****;*****;*****;*****            | 1759 |
| <b>R9-R10</b>  |        |            |                                                                                                                                                                        |      |
| sp             | P26039 | TLN1_MOUSE | LLDQTKTLAESALQLLYTAKAEGGNPKQAHTQEALAEAVQMMTEAVEDLTTTLNEAASA <b>AGVVGGM</b> VDSITQAINQLDE                                                                               | 1840 |
| sp             | P54939 | TLN1_CHICK | LLDQTKTLAESALQMLYTAKEAGGNPKQAHTQEALAEAVQMMKEAVEDLTTTLNEAASA <b>AGVVGGM</b> VDSITQAINQLDE<br>*****;*****;*****;*****;*****;*****;*****;*****;*****;*****;*****;*****    | 1839 |
| sp             | P26039 | TLN1_MOUSE | GPMGDPEGSFVDYQTTMVRTAKAIAVTVQEMVTKSNTSPEELGPLANQLTSDYGRLASQAKPAVAEAENEIEGAHIKHRV                                                                                       | 1920 |
| sp             | P54939 | TLN1_CHICK | GPMGEPEGTFVDYQTTMVRTAKAIAVTVQEMVTKSTTNPDELGILANQLTNDYQQLAQAKPAALTAENEIEGSHIKRRV<br>***;***;*****;*****;*****;*****.*;***;*****;***;*.***;*****;*****;*****;***;*       | 1919 |
| <b>R10-R11</b> |        |            |                                                                                                                                                                        |      |
| sp             | P26039 | TLN1_MOUSE | QELGHGCSALVTKAGALQCSPSDVYTKKELIECARRVSEKVSHVLAALQA <b>GNRGT</b> QCITAASAVSGIIADLDTTIMFAT                                                                               | 2000 |
| sp             | P54939 | TLN1_CHICK | QELGHGCAALVTKAGALQCSPSDAYTKKELIESARKVSEKVSHVLAALQA <b>GNRGT</b> QCITAASAVSGIIADLDTTIMFAT<br>*****;*****;*****;*****;*****;*****;*****;*****;*****;*****;*****;*****    | 1999 |
| sp             | P26039 | TLN1_MOUSE | AGTLNREGAETFADHREGILKTAKVLVEDTKVLVQNAAGSQEKLAQAAQSSVATITRLADVVKLGAASLGAEDPETQVVL                                                                                       | 2080 |
| sp             | P54939 | TLN1_CHICK | AGTLNRENETFADHREGILKTAKALVEDTKVLVQNTASQEKLAQAAQSSVATITRLAEVVKLGAASLGSDEPETQVVL<br>*****;.*****;*****;*****;*****;*****;*****;*****;*****;*****;*****;*****             | 2079 |
| <b>R11-R12</b> |        |            |                                                                                                                                                                        |      |
| sp             | P26039 | TLN1_MOUSE | INAVKDVAKALGDLISATKAAAGKVGDDPAVWQLKNSAKVMVTNVTSLKTKVKA <b>VED</b> EATKGTRALEATTEHIRQELAVF                                                                              | 2160 |
| sp             | P54939 | TLN1_CHICK | INAVKDVAKALGDLIGATKAAAGKAGDDPAVYQLKNSAKVMVTNVTSLKTKVKA <b>VED</b> EATKGTRALEATTEHIRQELAVF<br>*****;*****;*****;*****;*****;*****;*****;*****;*****;*****;*****;*****   | 2159 |
| sp             | P26039 | TLN1_MOUSE | CSPEPPAKTSTPEDFIRMTKGITMATAKAVAAGNSCRQEDVIATANLSRRAIADMLRACKEAAHFPEVAPDVRLRALHYG                                                                                       | 2240 |
| sp             | P54939 | TLN1_CHICK | SSPVPPAQVSTPEDFIRMTKGITMATAKAVAAGNSCRQEDVIATANLSRRAIADMLRACKEAAHYHPEVSADVRQALRFG<br>.*.***;.*****;*****;*****;*****;*****;*****;*****;*****;*****;*****;*****          | 2239 |
| <b>R12-R13</b> |        |            |                                                                                                                                                                        |      |
| sp             | P26039 | TLN1_MOUSE | RECANGYLELLDHVLLTLQKPNPDLKQQLTGHSKRVAGSVTELIQAAE <b>AMKGT</b> EWVDPEDPTVIAENELLGAAAAIEAAA                                                                              | 2320 |
| sp             | P54939 | TLN1_CHICK | KECADGYLELLEHVLVILQKPTHELKQQLAGYSKRVASSVTELIQAAE <b>AMKGT</b> EWVDPEDPTVIAENELLGAAAAIEAAA<br>;***;*****;***;****;.*****;*****;*****;*****;*****;*****;*****;*****      | 2319 |
| sp             | P26039 | TLN1_MOUSE | KKLEQLKPRAKPKADESLNFEEQILEAAKSIAAATSALVKAASAAQRELVAQGVGAIPANALDDGQWSQGLISAARMV                                                                                         | 2400 |
| sp             | P54939 | TLN1_CHICK | KKLEQLKPRAKPKQADESLDFEEQILEAAKSIAAATSALVKAASAAQRELVAQGVGVIPANAVDDGQWSQGLISAARMV<br>*****;*****;*****;*****;*****;*****;*****;*****;*****;*****;*****;*****             | 2399 |
| sp             | P26039 | TLN1_MOUSE | AAATNNLCEAANAAVQGHASQEKLISSAKQVAASTAQLLVACKVKADQDSEAMKRLQAAGNAVKRASDNLVKAQKAAAF                                                                                        | 2480 |
| sp             | P54939 | TLN1_CHICK | AAATNNLCEAANAAVQGHASEEKLISSAKQVAASTAQLLVACKVKADHDSEAMKRLQAAGNAVKRASDNLVKAQKAAAF<br>*****;*****;*****;*****;*****;*****;*****;*****;*****;*****;*****;*****             | 2479 |
| sp             | P26039 | TLN1_MOUSE | EDQENETVVVKEKMGVGGIAQIIAAQEMLRKRERELEEARKKLAQIRQQQYKFLPSELRDE--H                                                                                                       | 2541 |
| sp             | P54939 | TLN1_CHICK | QDH-DETVVVVKEKMGVGGIAQIIAAQEMLRKRERELEEARKKLAMIRQQQYKFLPTELRLDEEQN<br>;*. ;*****;*****;*****;*****;*****;*****;*****;*****;*****;*****;*****                           | 2541 |

**Figure S2. Sequence alignment of mouse and chicken talin 1.** The linker regions between the rod domains R1-R13 are marked in red.

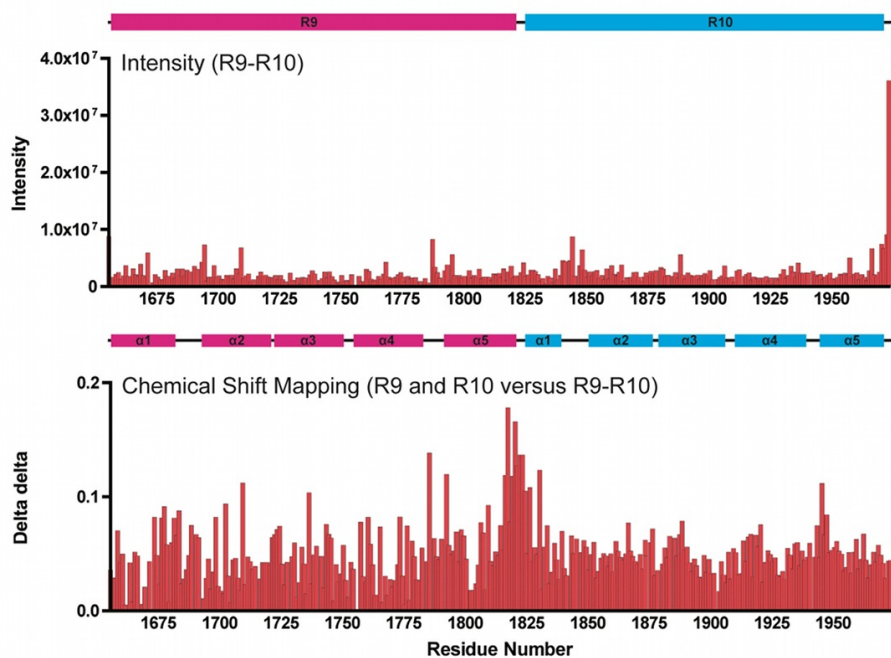

**Figure S3. Analysis of the R9-R10 double domain.** The R9-R10 double domain is separated by a short hinge. The domain boundaries are shown schematically above the plots, the secondary structure elements are shown schematically between the plots. Top. Plot of  $^1\text{H}, ^{15}\text{N}$ -HSQC peak height as a function of residue number. The peak height is essentially uniform across. Bottom. Chemical shift mapping (CSM) of the individual R9 and R10 domains compared with the R9-R10 double domain. Small chemical shift changes are observed across the whole of the protein with the main changes clustering in the linker region between the two domains.

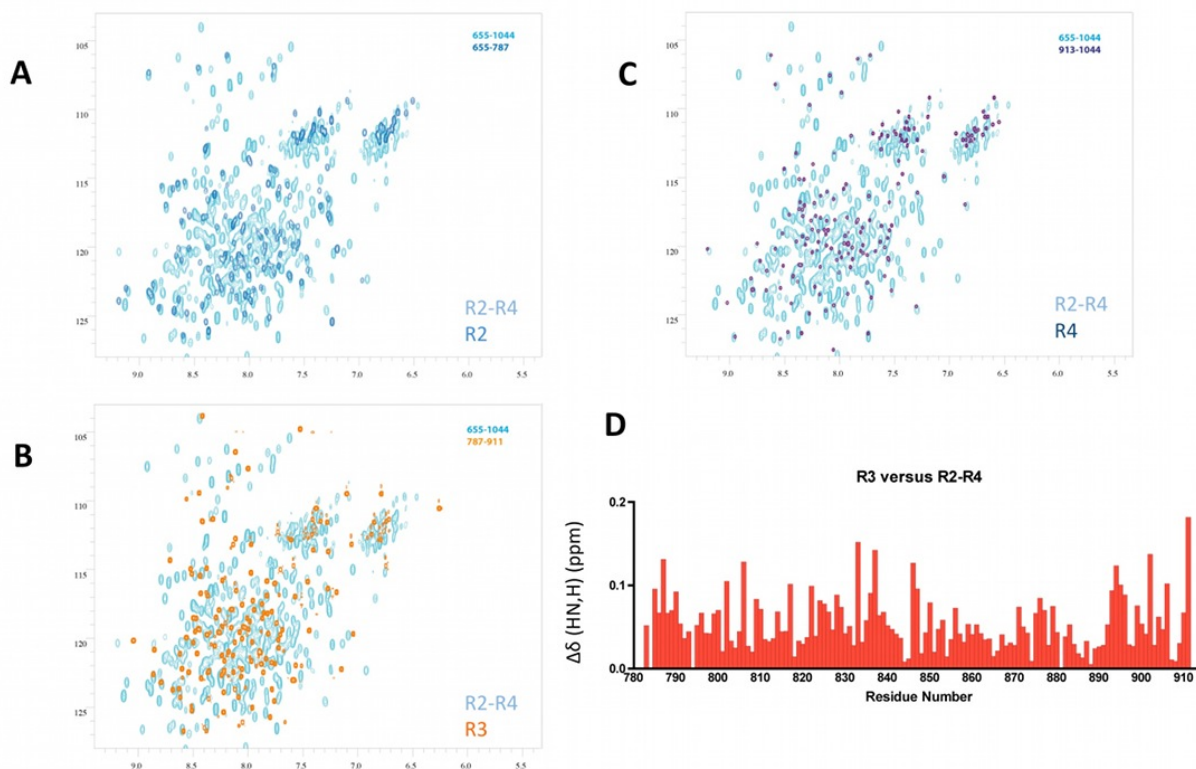

**Figure S4.**  $^1\text{H}$ ,  $^{15}\text{N}$ -HSQC spectra of the three 4-helix bundles in the context of the triple domain R2-R3-R4. The triple domain R2-R3-R4 (sky blue) overlaid with (A) R2 (blue), (B) R3 (orange) and (C) R4 (navy blue). (D) Chemical shift mapping of R3 in the context of R2-R4.

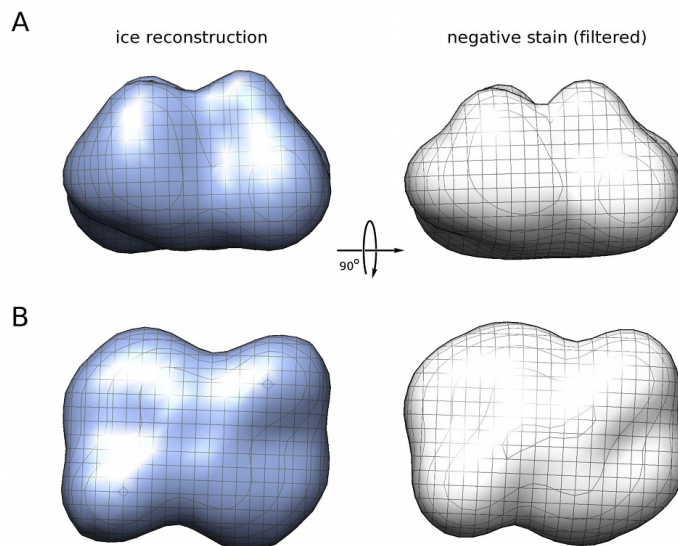

**Figure S5.** Cryo-EM reconstruction corresponds to negative stain reconstruction but is more limited in resolution. Comparison of the cryo-EM reconstruction at (3.5-nm resolution) (A) with the negative-stain reconstruction filtered to the same resolution (B). The correlation between the two maps is  $0.97 \pm 0.02$  indicating that there is no difference between the two at the resolution of the cryo-EM reconstruction. Standard deviation was calculated from comparisons of reconstructions from different image processing runs.

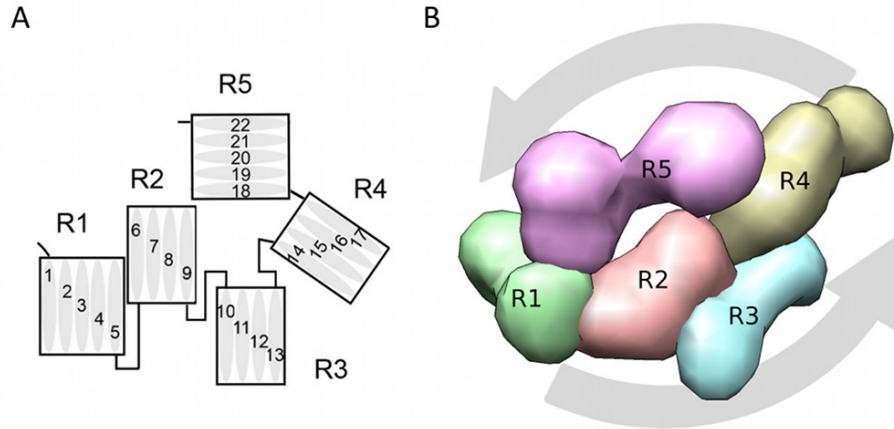

**Figure S6. Fitting the N-terminal region of the rod.** (A) Schematic representation of the topology and connectivity of the N-terminal region of the rod. (B) The same region shown as resulting from fitting the SAXS envelopes of individual rod domains constraint by the inter-domain angles observed by SAXS into the EM reconstruction. The arrows indicate the overall directionality of the chain, which reverses at R4.

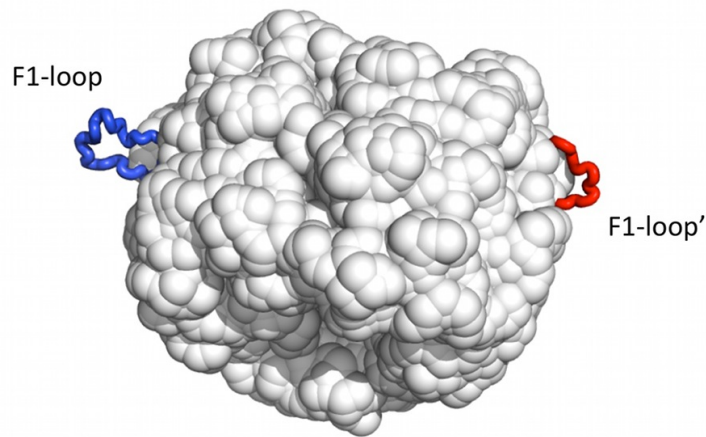

**Figure S7. Structural modeling of the F1-loop onto the EM structure of talin.** The F1-loops in the two talin subunits are large enough (>30 residues) to protrude from the interior of the molecule.

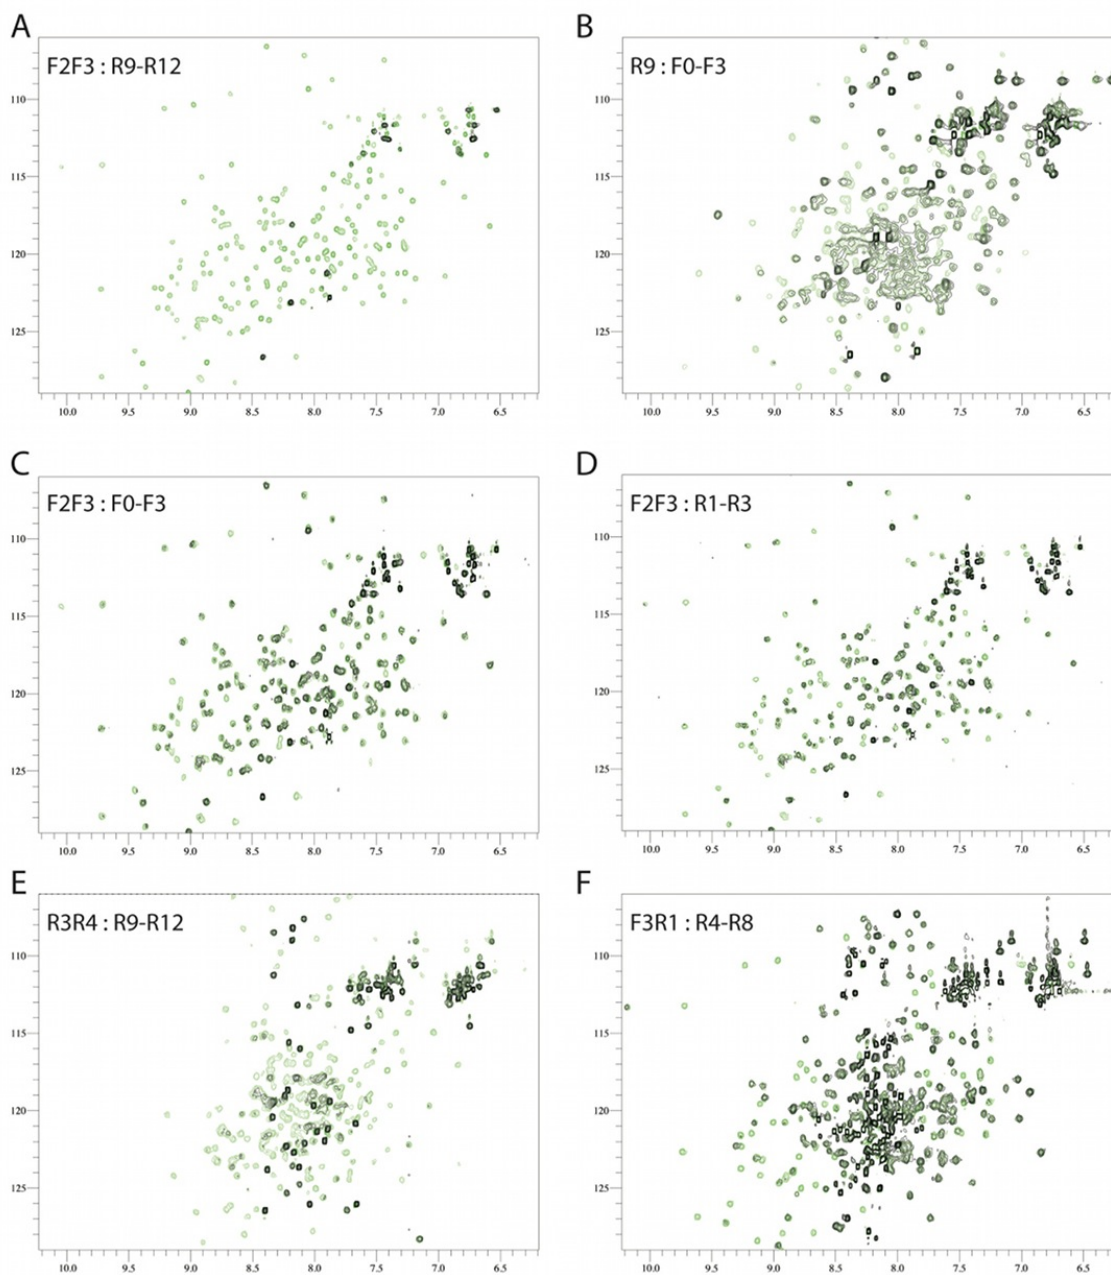

**Figure S8. Identification of intra-molecular interactions in talin1 by NMR.**  $^1\text{H}$ ,  $^{15}\text{N}$ -HSQC spectra of 100  $\mu\text{M}$   $^{15}\text{N}$ -labeled talin1 domain in the absence (green) or presence (black) of a 3-fold molar excess of unlabeled talin fragment. (A)  $^{15}\text{N}$ -labelled F2F3 with unlabeled R9-R12; (B)  $^{15}\text{N}$ -labelled R9 with unlabeled F0-F3; (C)  $^{15}\text{N}$ -labelled F2F3 with unlabeled F0-F3; (D)  $^{15}\text{N}$ -labelled F2F3 with unlabeled R1-R3; (E)  $^{15}\text{N}$ -labelled R3R4 with unlabeled R9-R12; (F)  $^{15}\text{N}$ -labelled F3R1 with unlabeled R4-R8.

## SUPPLEMENTARY REFERENCES

- Gingras, A.R., N. Bate, B.T. Goult, L. Hazelwood, I. Canestrelli, J.G. Grossmann, H. Liu, N.S. Putz, G.C. Roberts, N. Volkman, D. Hanein, I.L. Barsukov, and D.R. Critchley, 2008. The structure of the C-terminal actin-binding domain of talin. *EMBO J* 27: 458-69.
- Gingras, A.R., W.H. Ziegler, A.A. Bobkov, M.G. Joyce, D. Fasci, M. Himmel, S. Rothemund, A. Ritter, J.G. Grossmann, B. Patel, N. Bate, B.T. Goult, J. Emsley, I.L. Barsukov, G.C. Roberts, R.C. Liddington, M.H. Ginsberg, and D.R. Critchley, 2009. Structural determinants of integrin binding to the talin rod. *J Biol Chem* 284: 8866-76.
- Papagrigoriou, E., A.R. Gingras, I.L. Barsukov, N. Bate, I.J. Fillingham, B. Patel, R. Frank, W.H. Ziegler, G.C. Roberts, D.R. Critchley, and J. Emsley, 2004. Activation of a vinculin-binding site in the talin rod involves rearrangement of a five-helix bundle. *Embo J* 23: 2942-2951.
